# Supplementary material for: Metal distribution in first flush in highway runoff of one of the busiest motorway junctions in the UK
Source: Royal Society of Chemistry journal article supplement (doi:10.1039/d2ew00919f), 2023-01-01
Supplement: d2ew00919f1.pdf [file d2ew00919f1.pdf]

### Electronic Supplementary Information

Julia Zakharova<sup>a</sup>; Hamid Pouran<sup>a</sup>; Andrew Wheatley<sup>b</sup>

<sup>a</sup> Faculty of Science and Engineering, University of Wolverhampton, Wolverhampton, UK; <sup>b</sup> School of Architecture, Building and Civil Engineering, Loughborough University, Loughborough, UK

The drawings of the M(V) curves for the two events are shown in Figures 1 – 10 for such pollutants as TSS, TOC, Fe<sub>tot</sub>, Zn<sub>tot</sub> and Zn<sub>dis</sub>. In both cases the numbers indicate the order of drawing for each point of the M(V) curve from both the hydrograph and pollutograph.

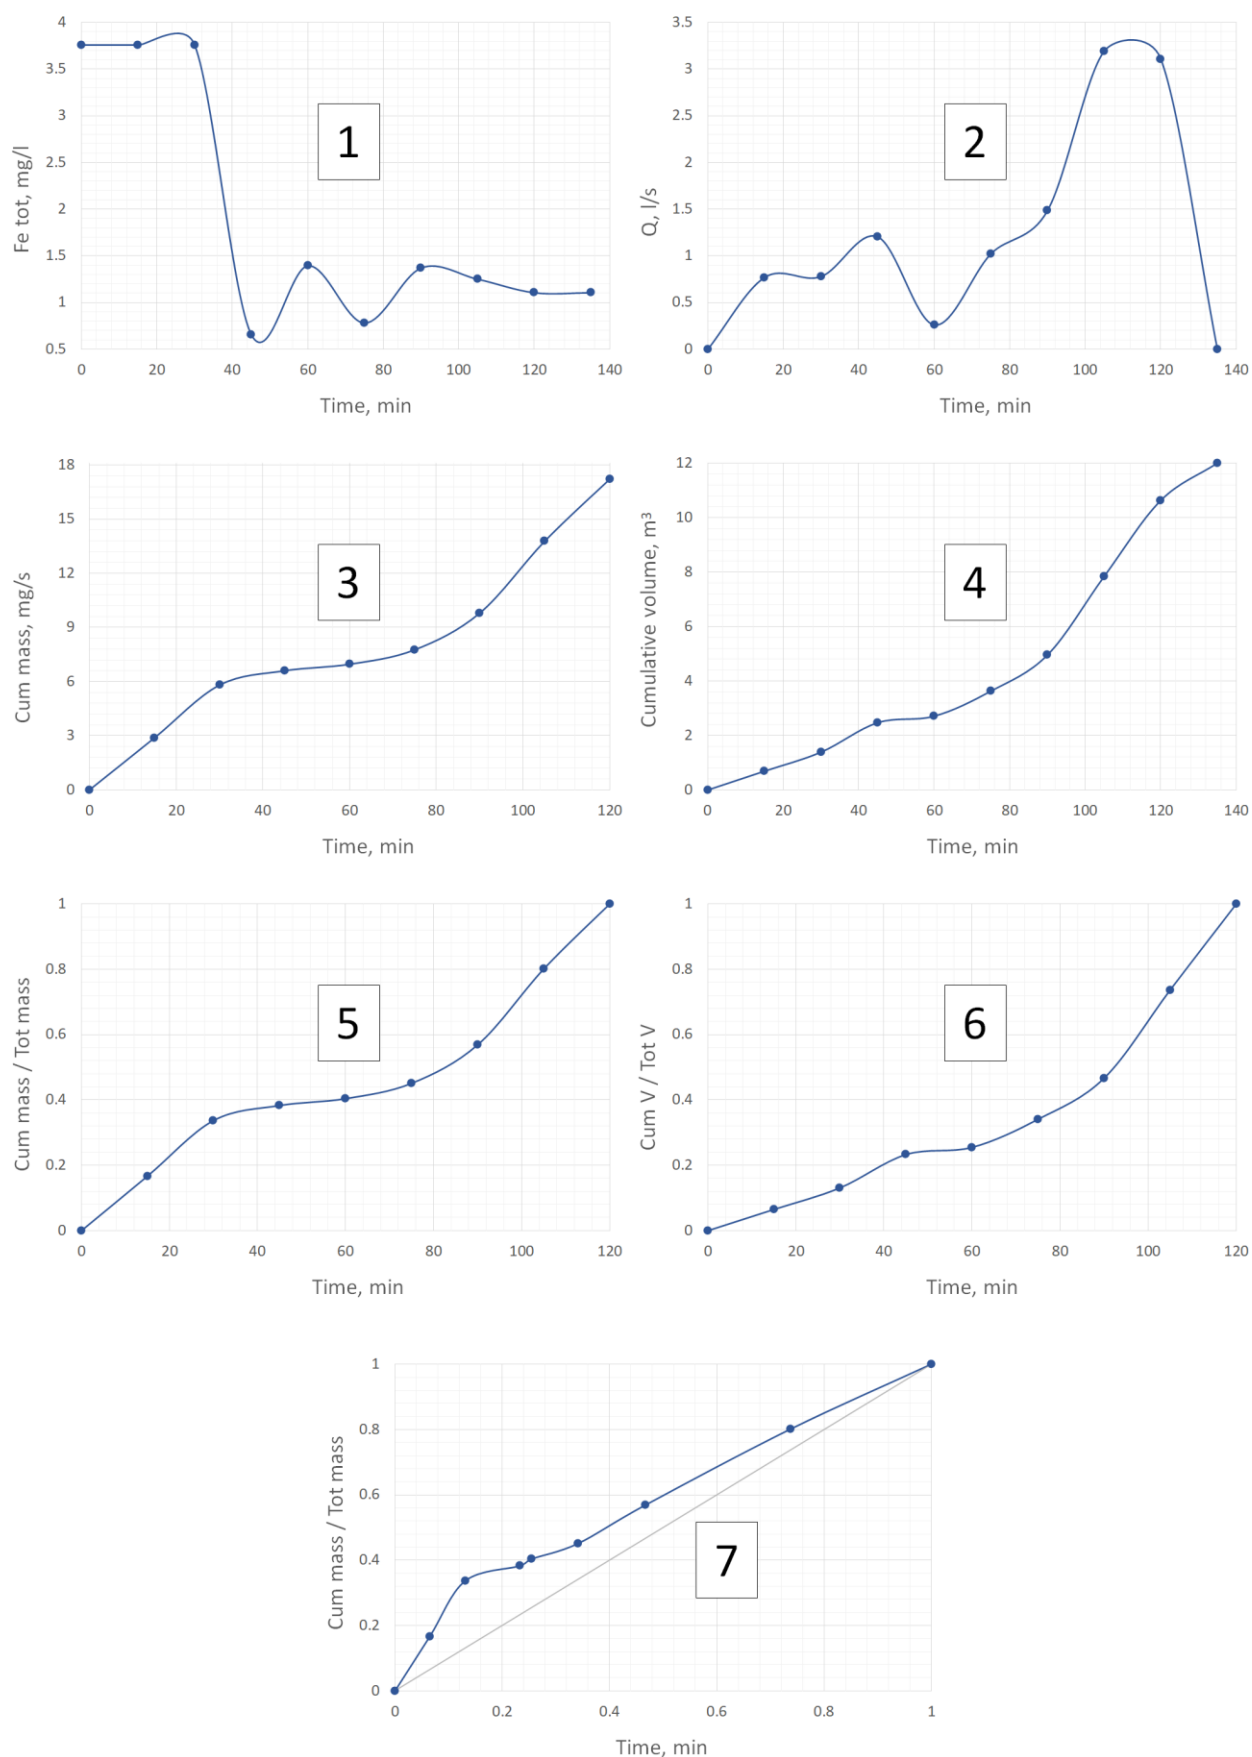

**Fig. 1** Example of the drawing of one M(V) curve for  $\text{Fe}_{\text{tot}}$  for event 1

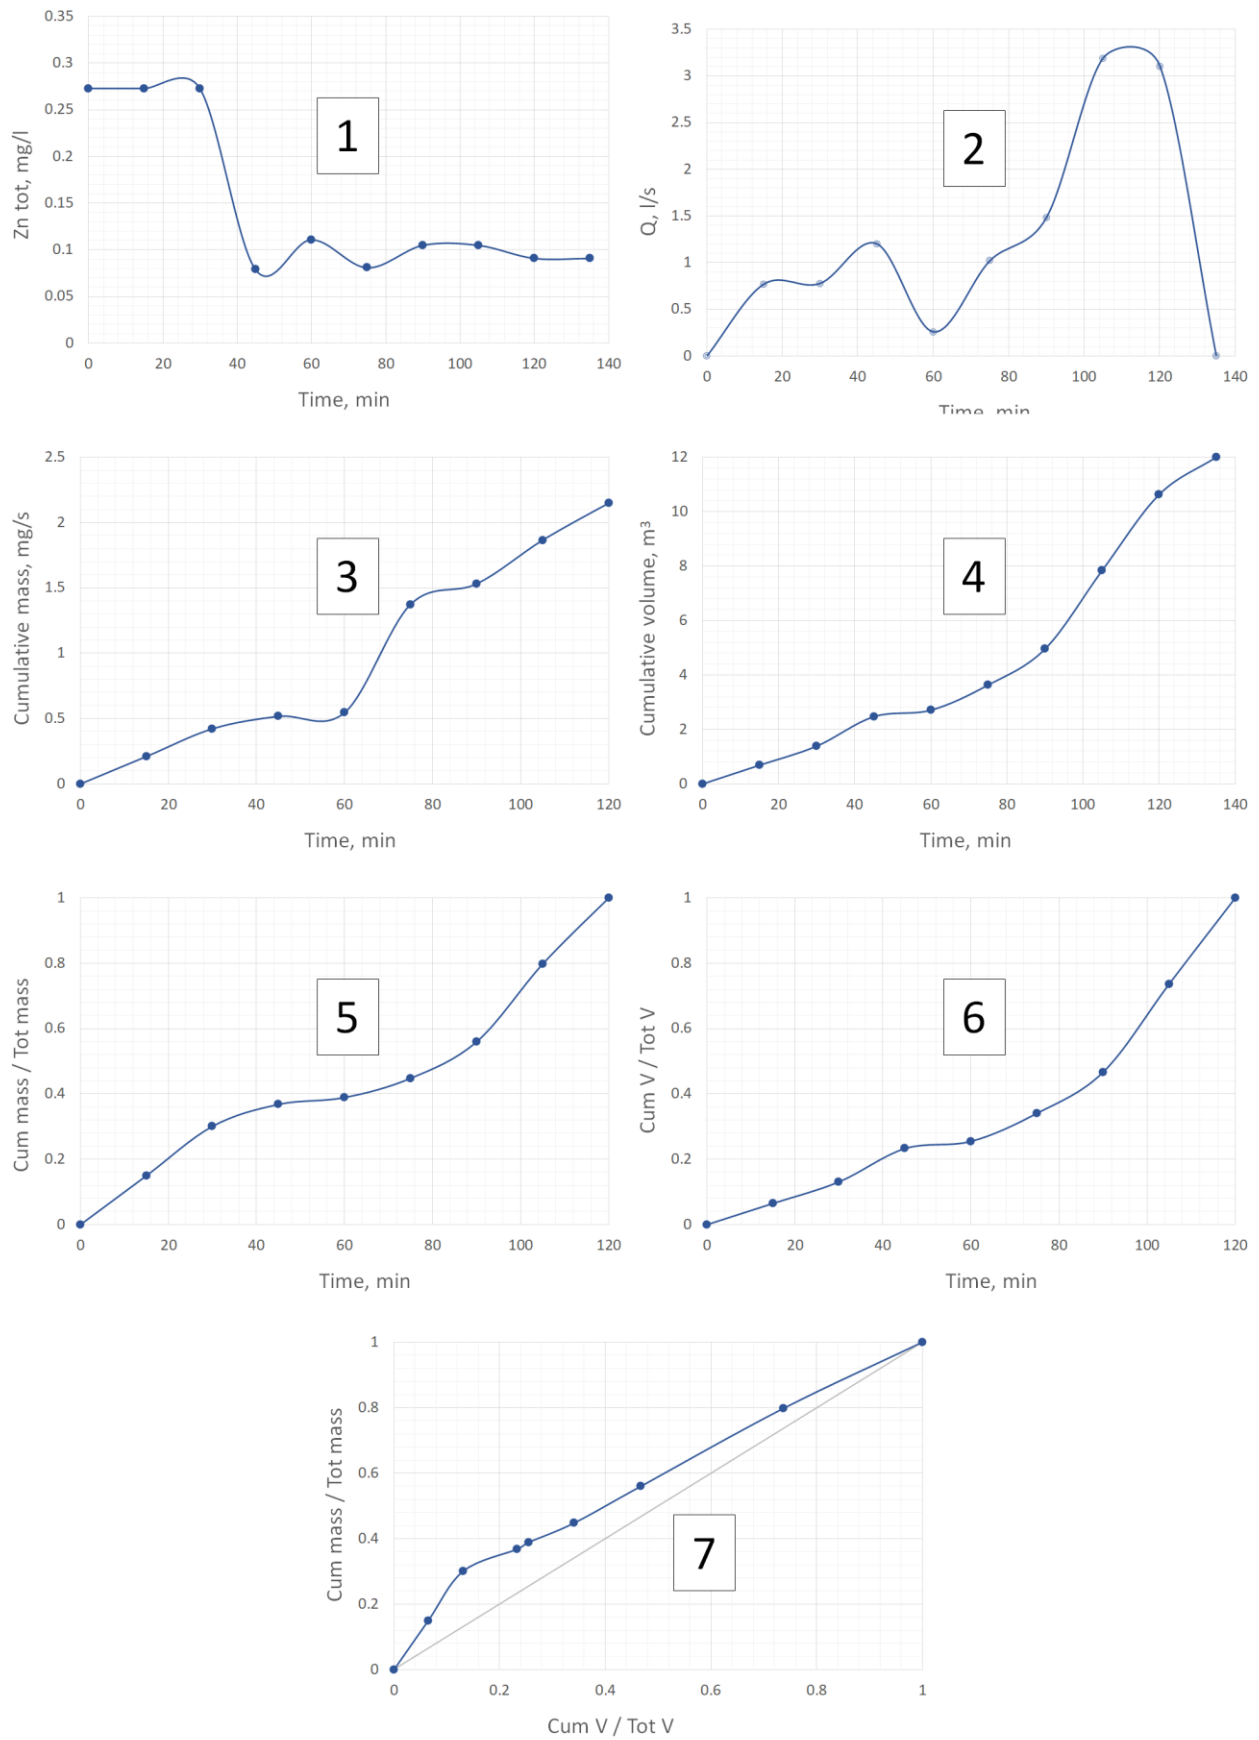

**Fig. 2** Example of the drawing of one M(V) curve for  $Zn_{tot}$  for event 1

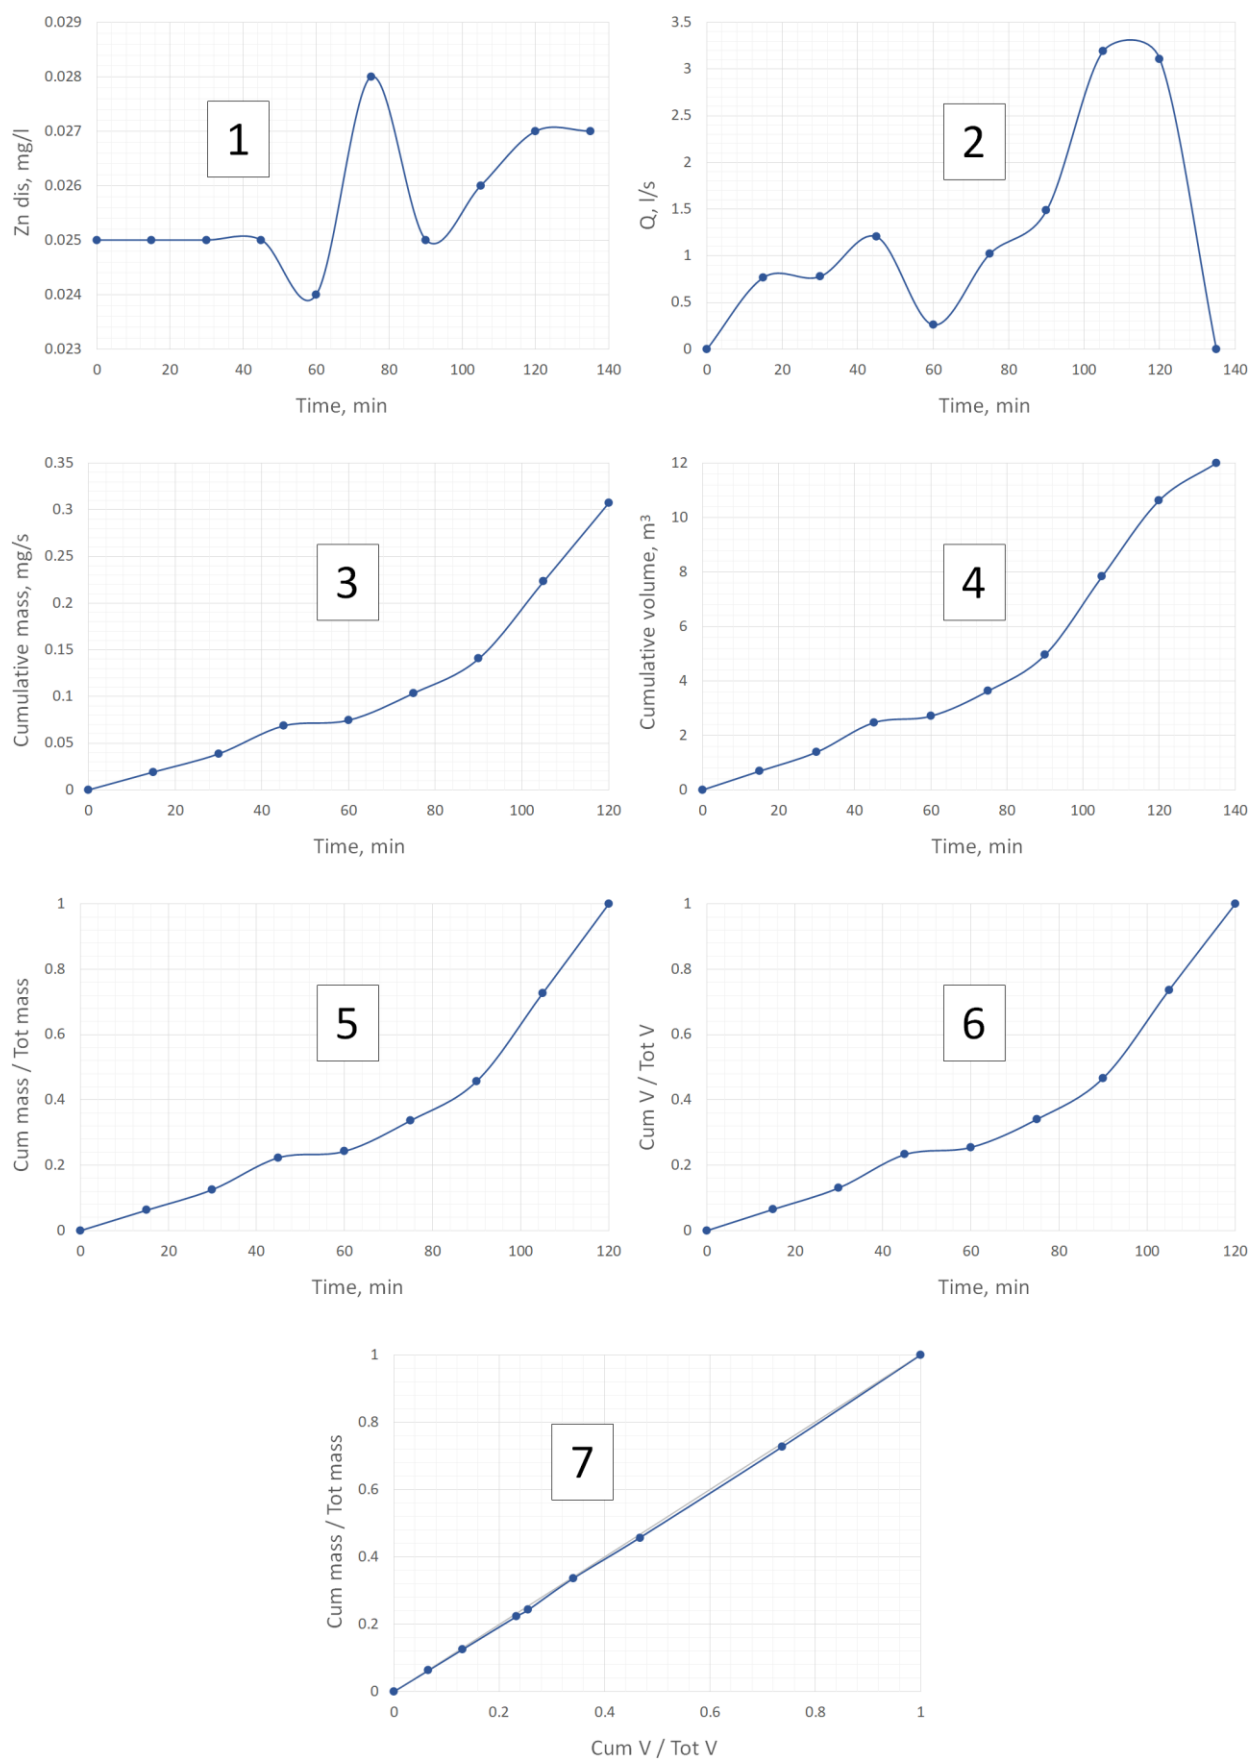

**Fig. 3** Example of the drawing of one M(V) curve for Zn<sub>dis</sub> for event 1

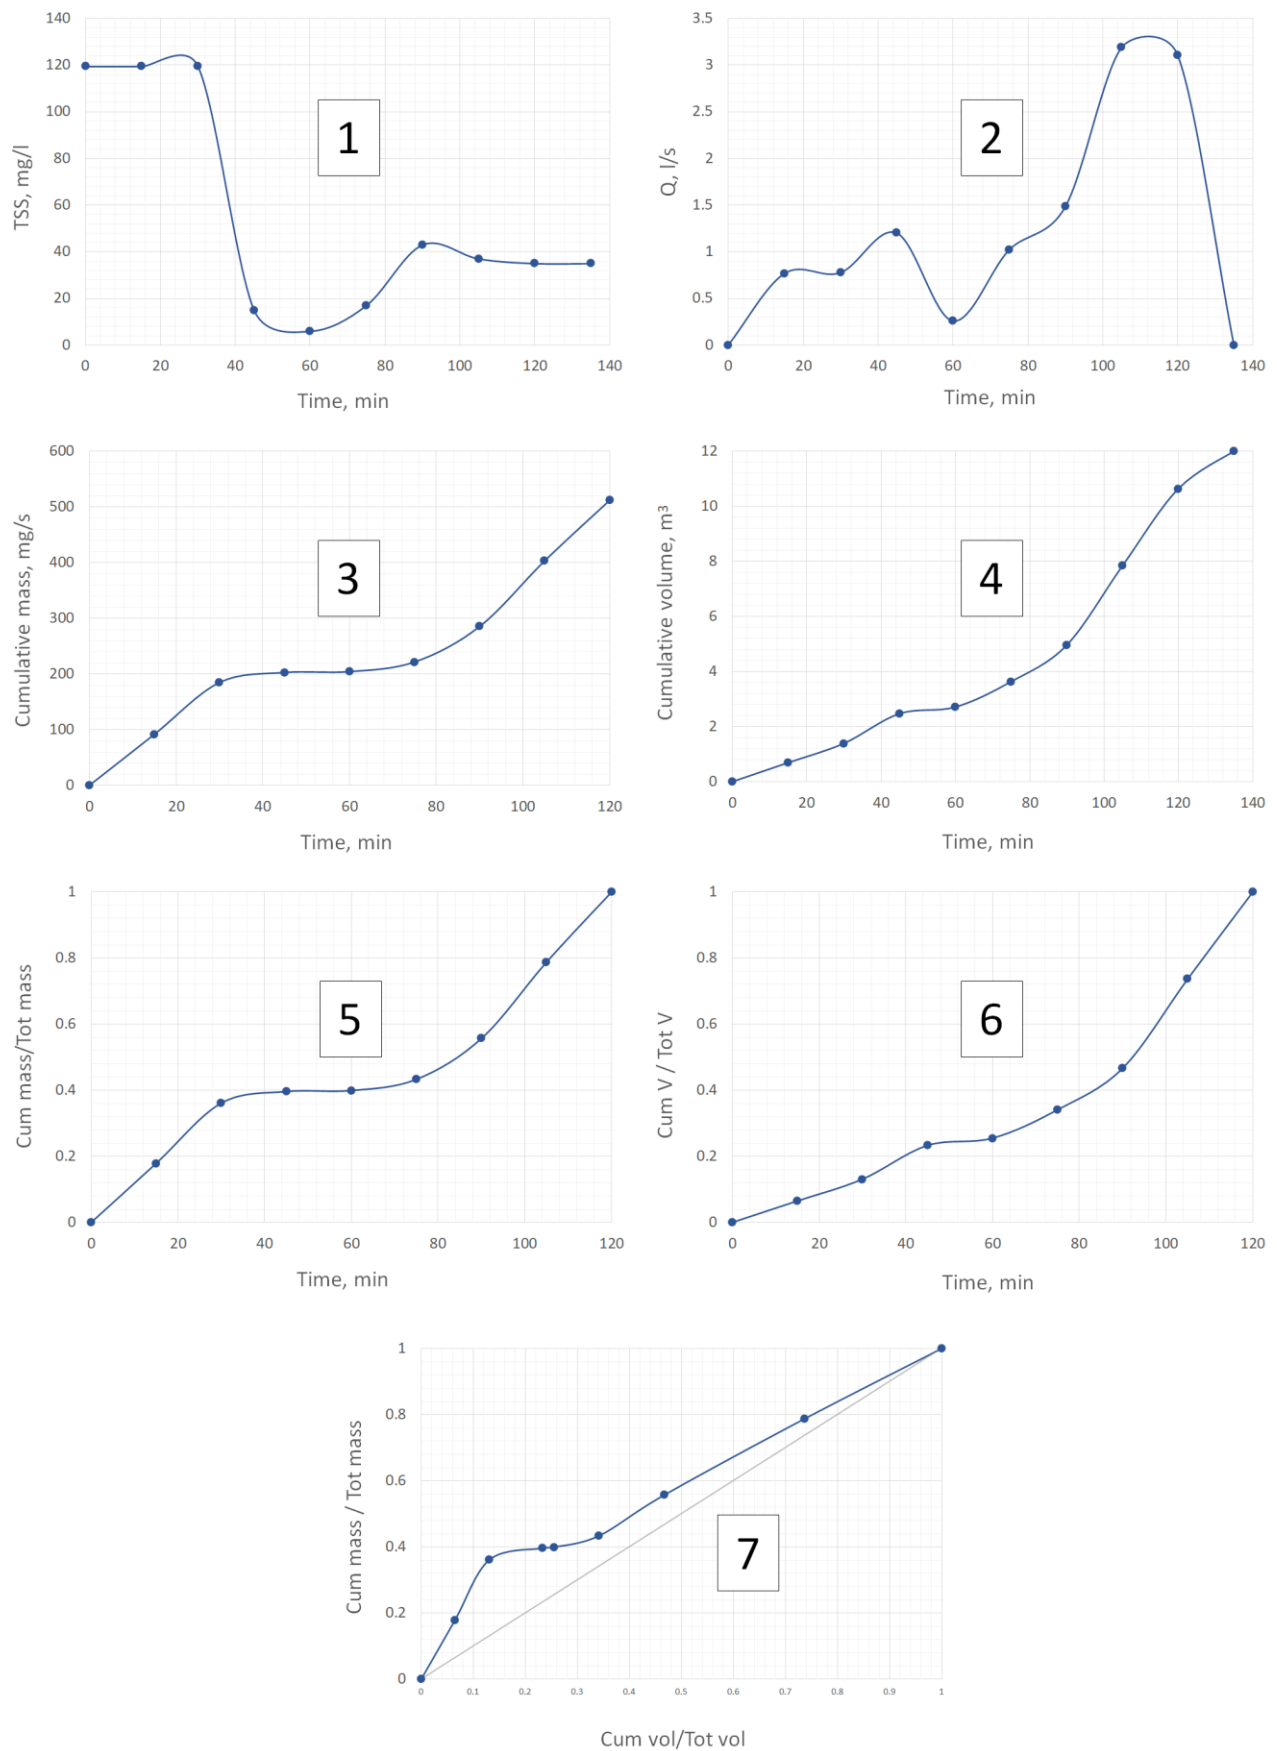

**Fig. 4** Example of the drawing of one M(V) curve for TSS for event 1

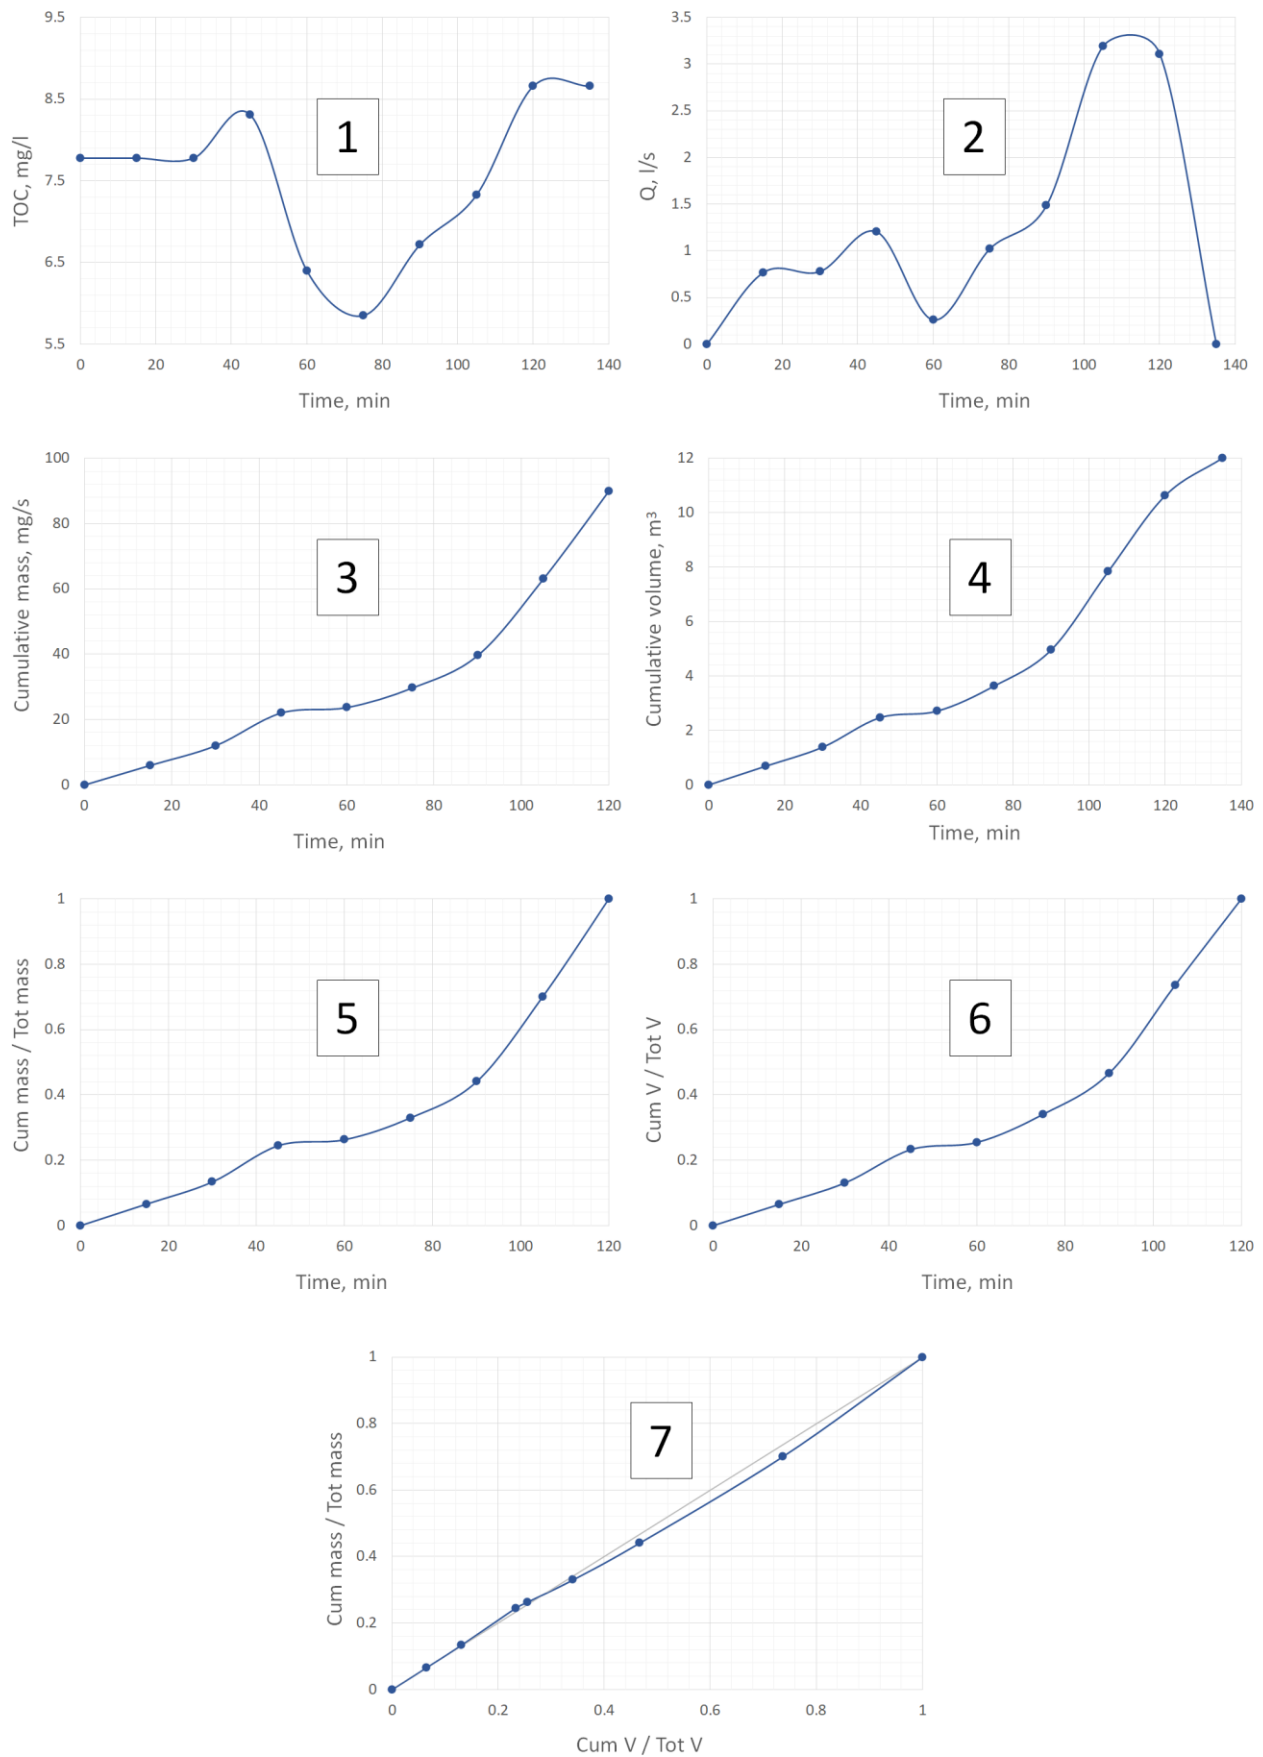

**Fig. 5** Example of the drawing of one M(V) curve for TOC for event 1

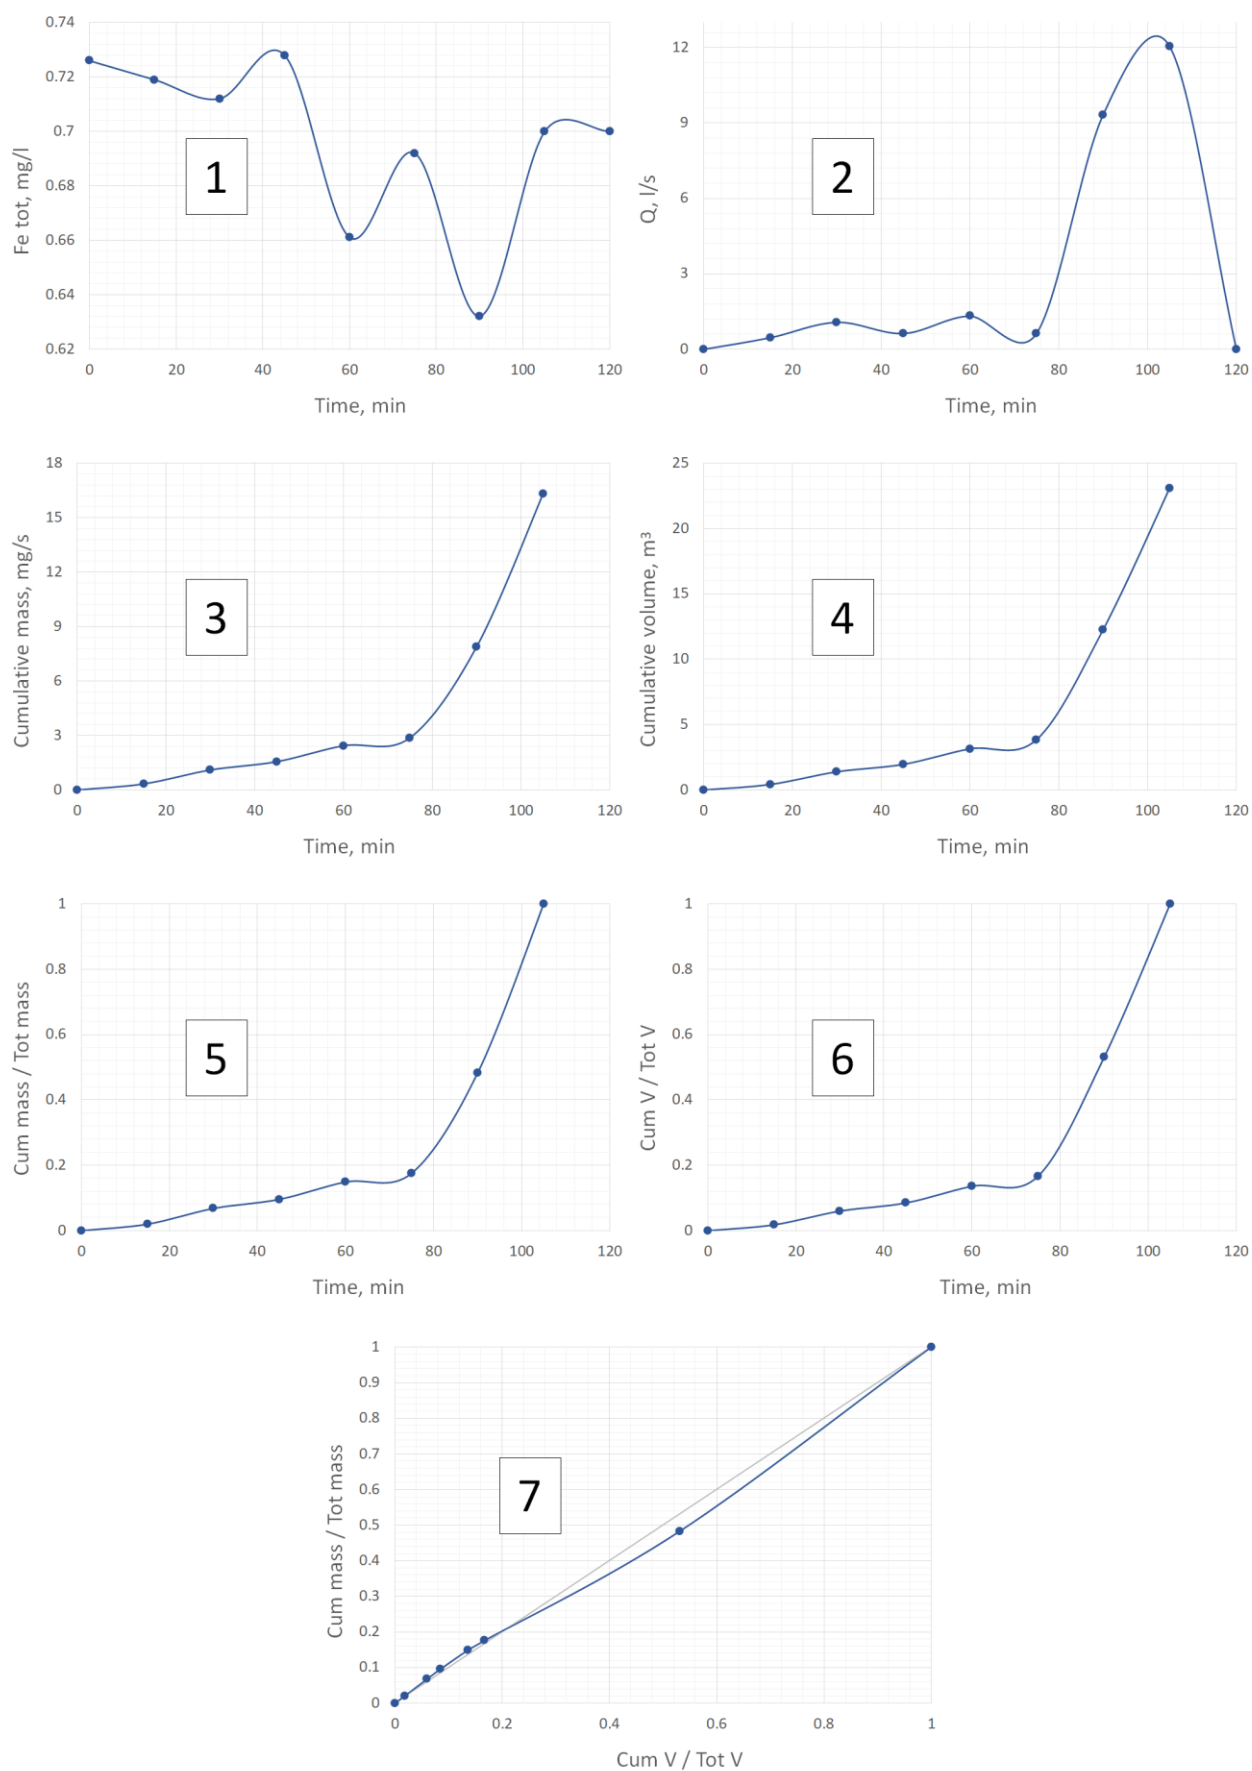

**Fig. 6** Example of the drawing of one M(V) curve for  $\text{Fe}_{\text{tot}}$  for event 2

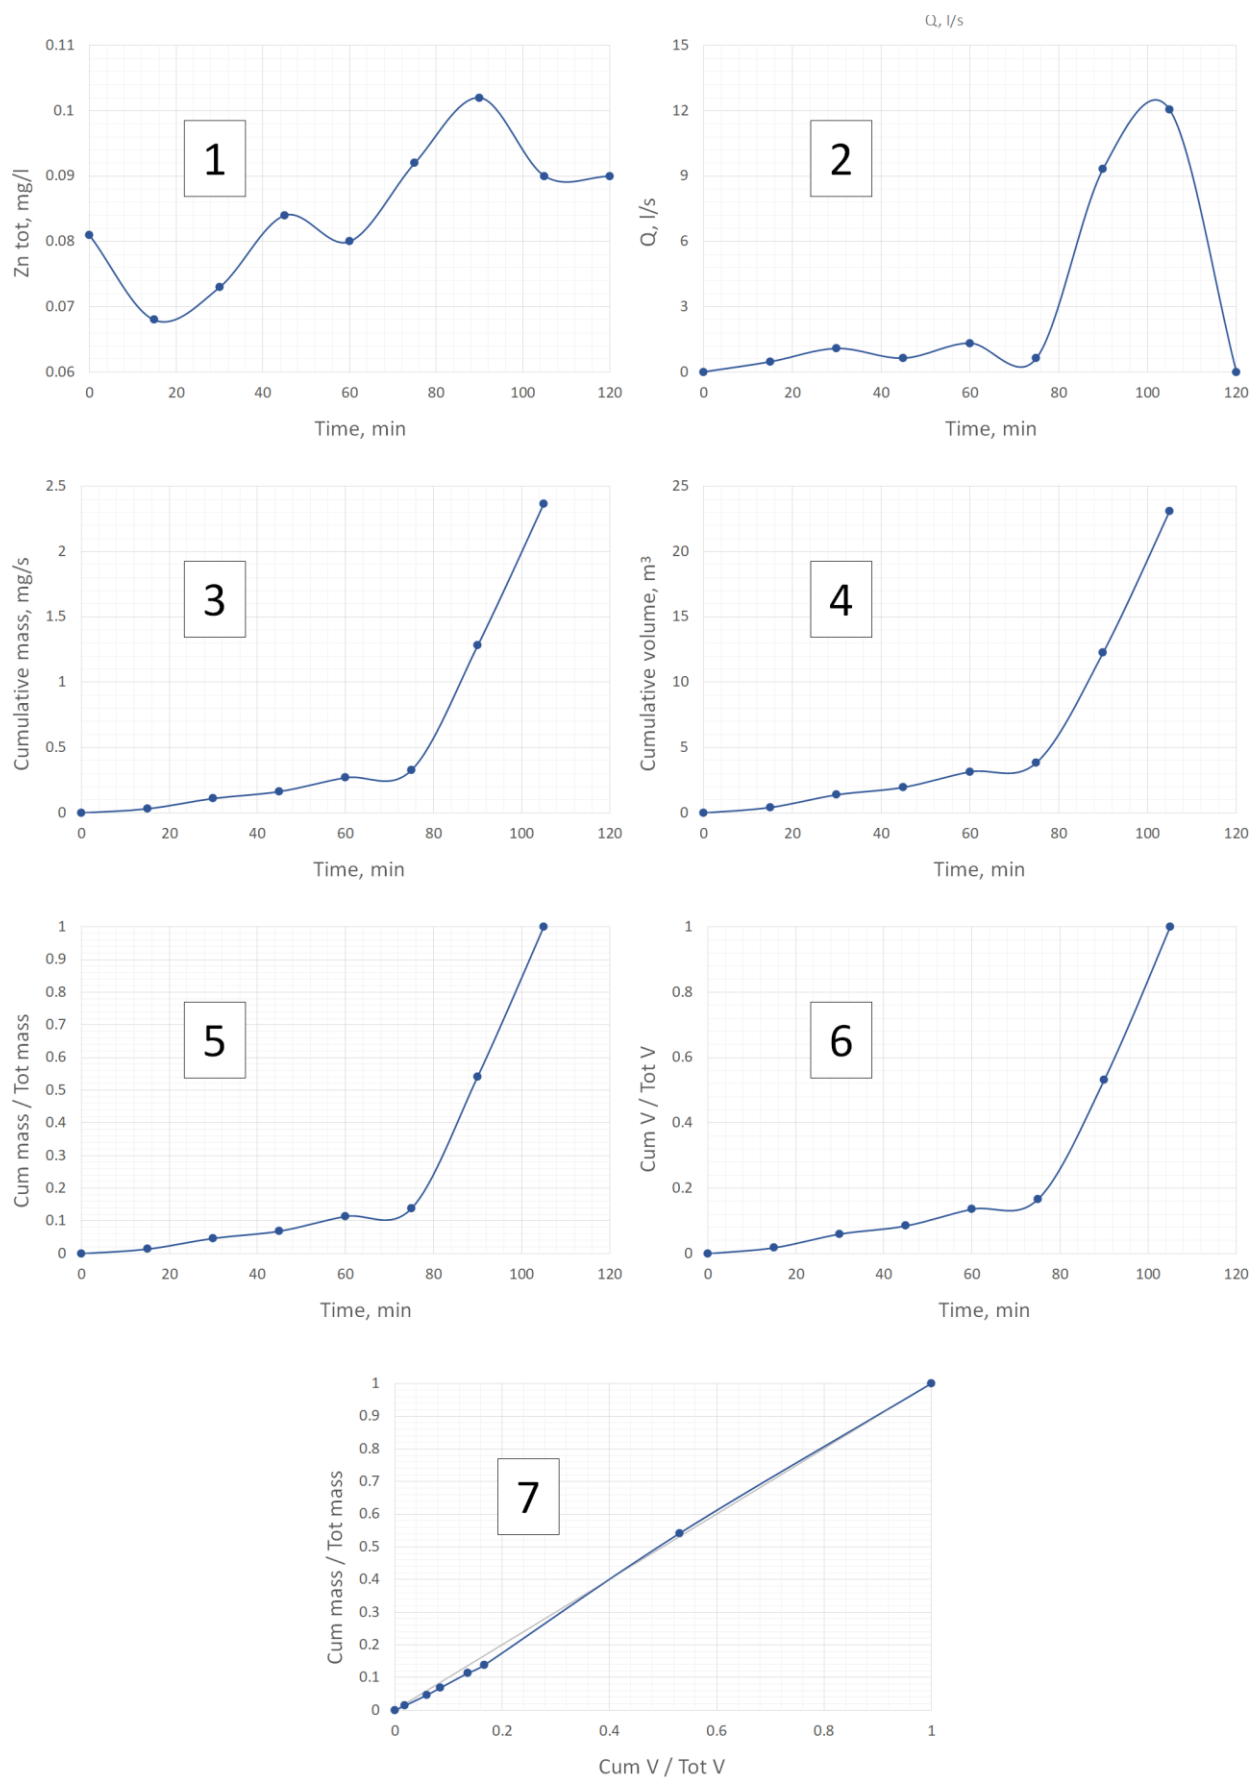

**Fig. 7** Example of the drawing of one M(V) curve for  $Zn_{tot}$  for event 2



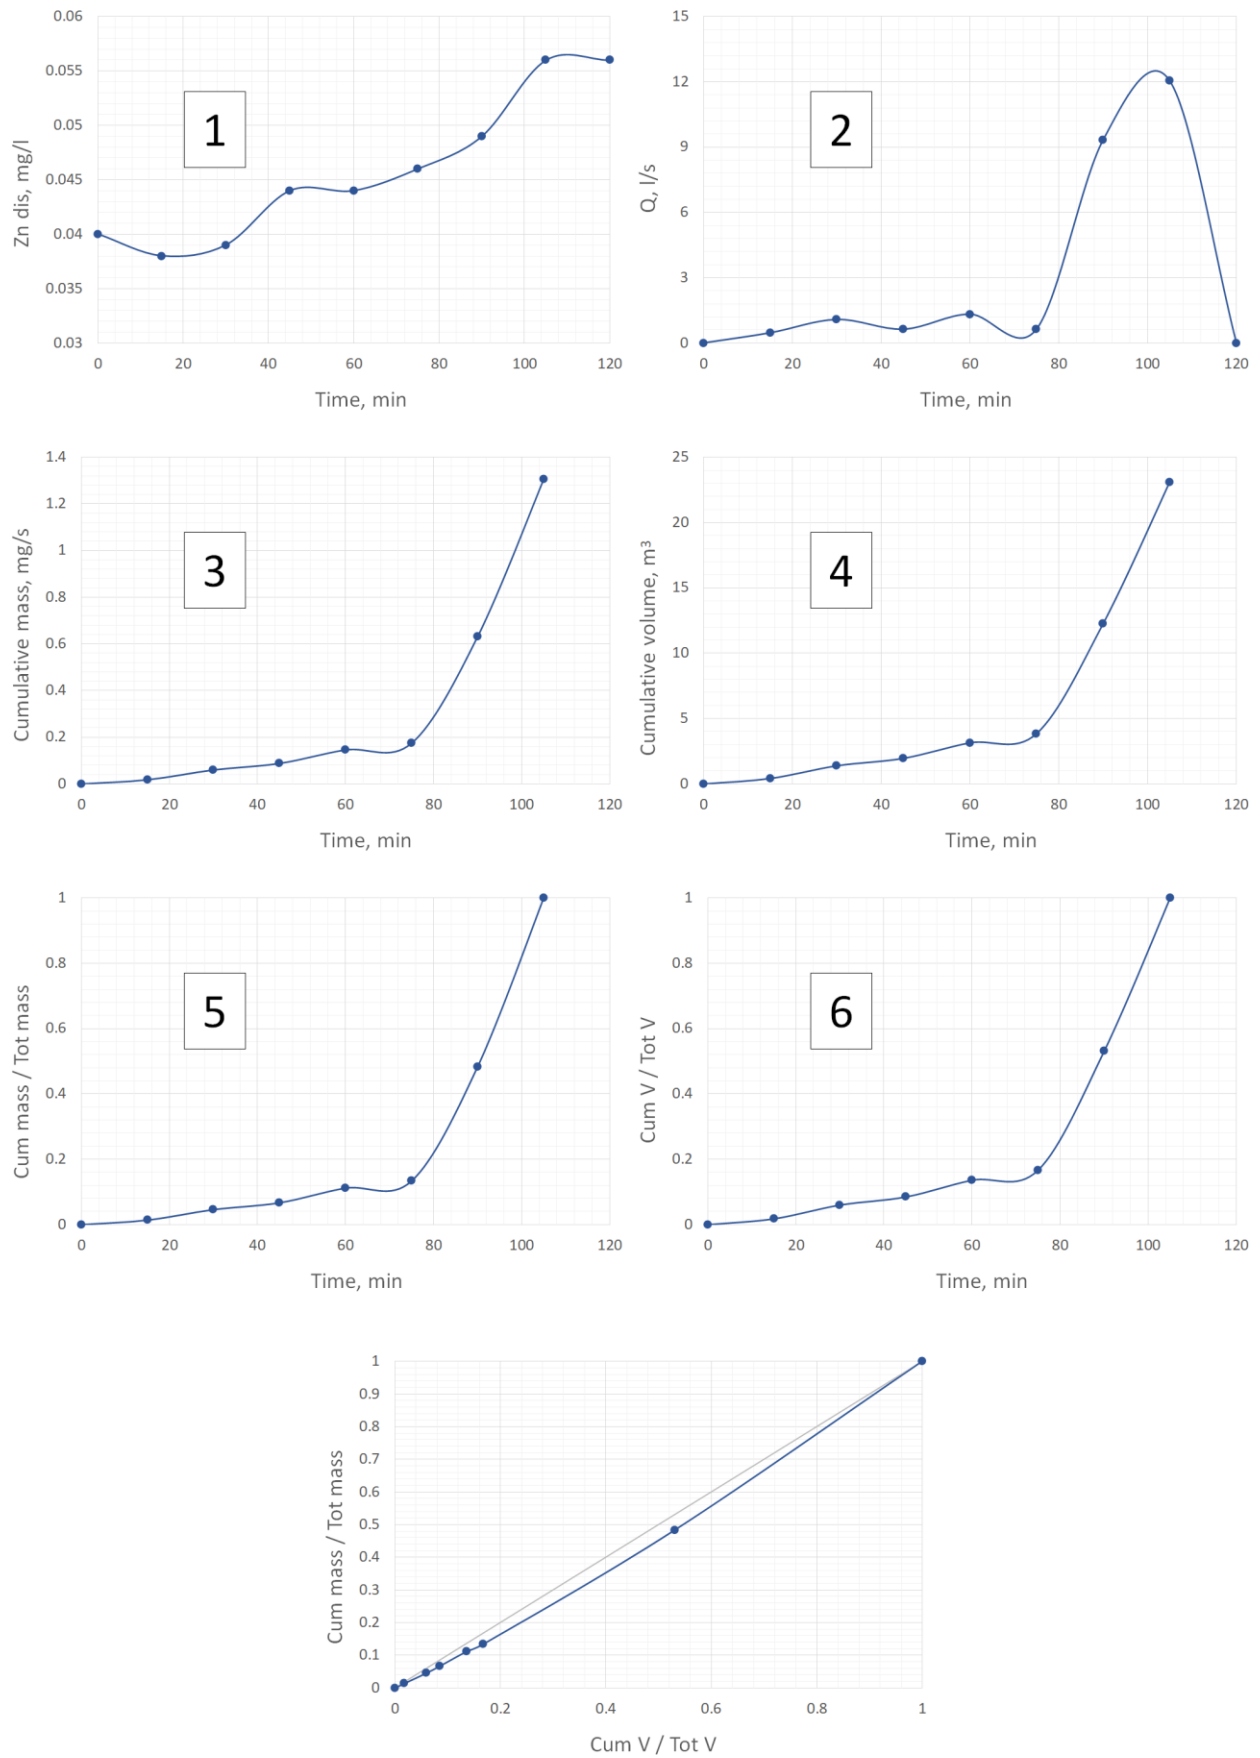

**Fig. 8** Example of the drawing of one M(V) curve for Zn<sub>dis</sub> for event 2

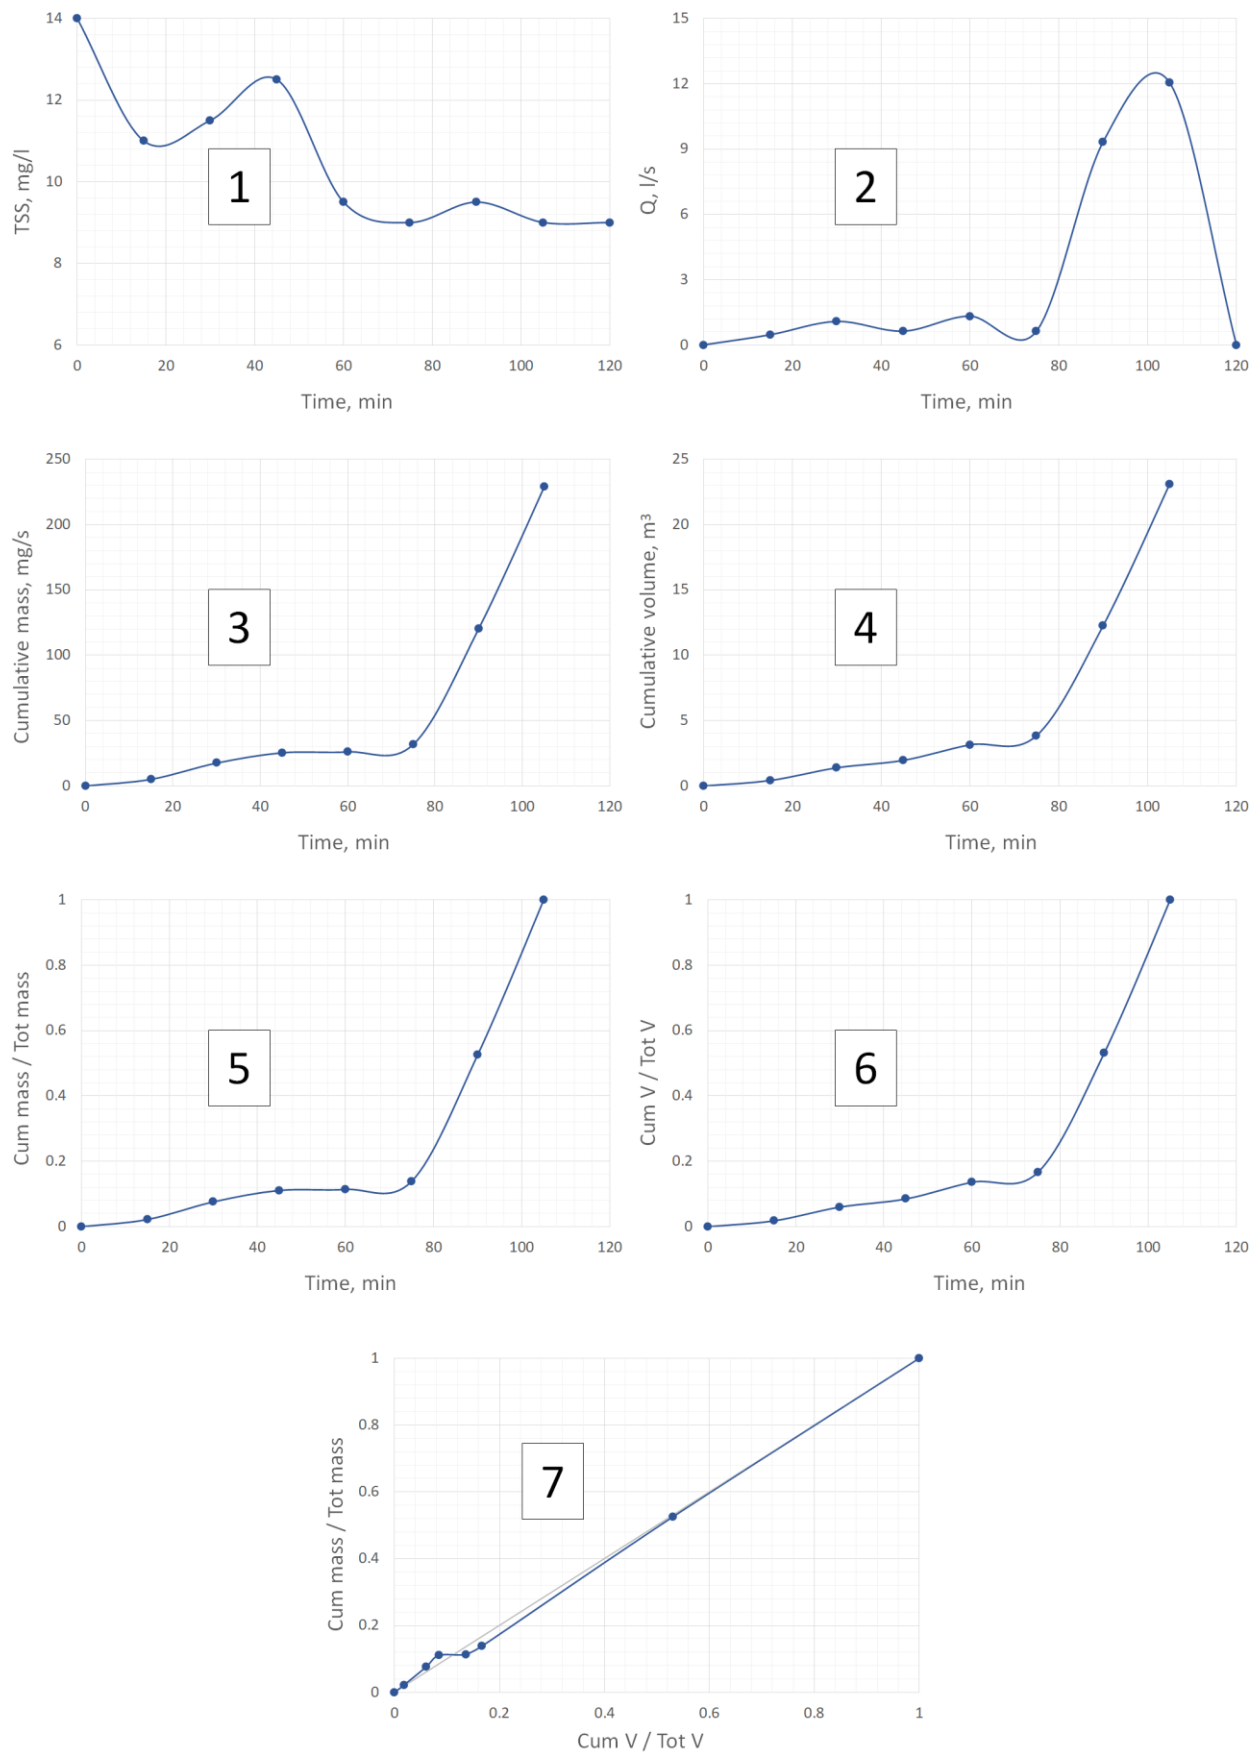

**Fig. 9** Example of the drawing of one M(V) curve for TSS for event 2

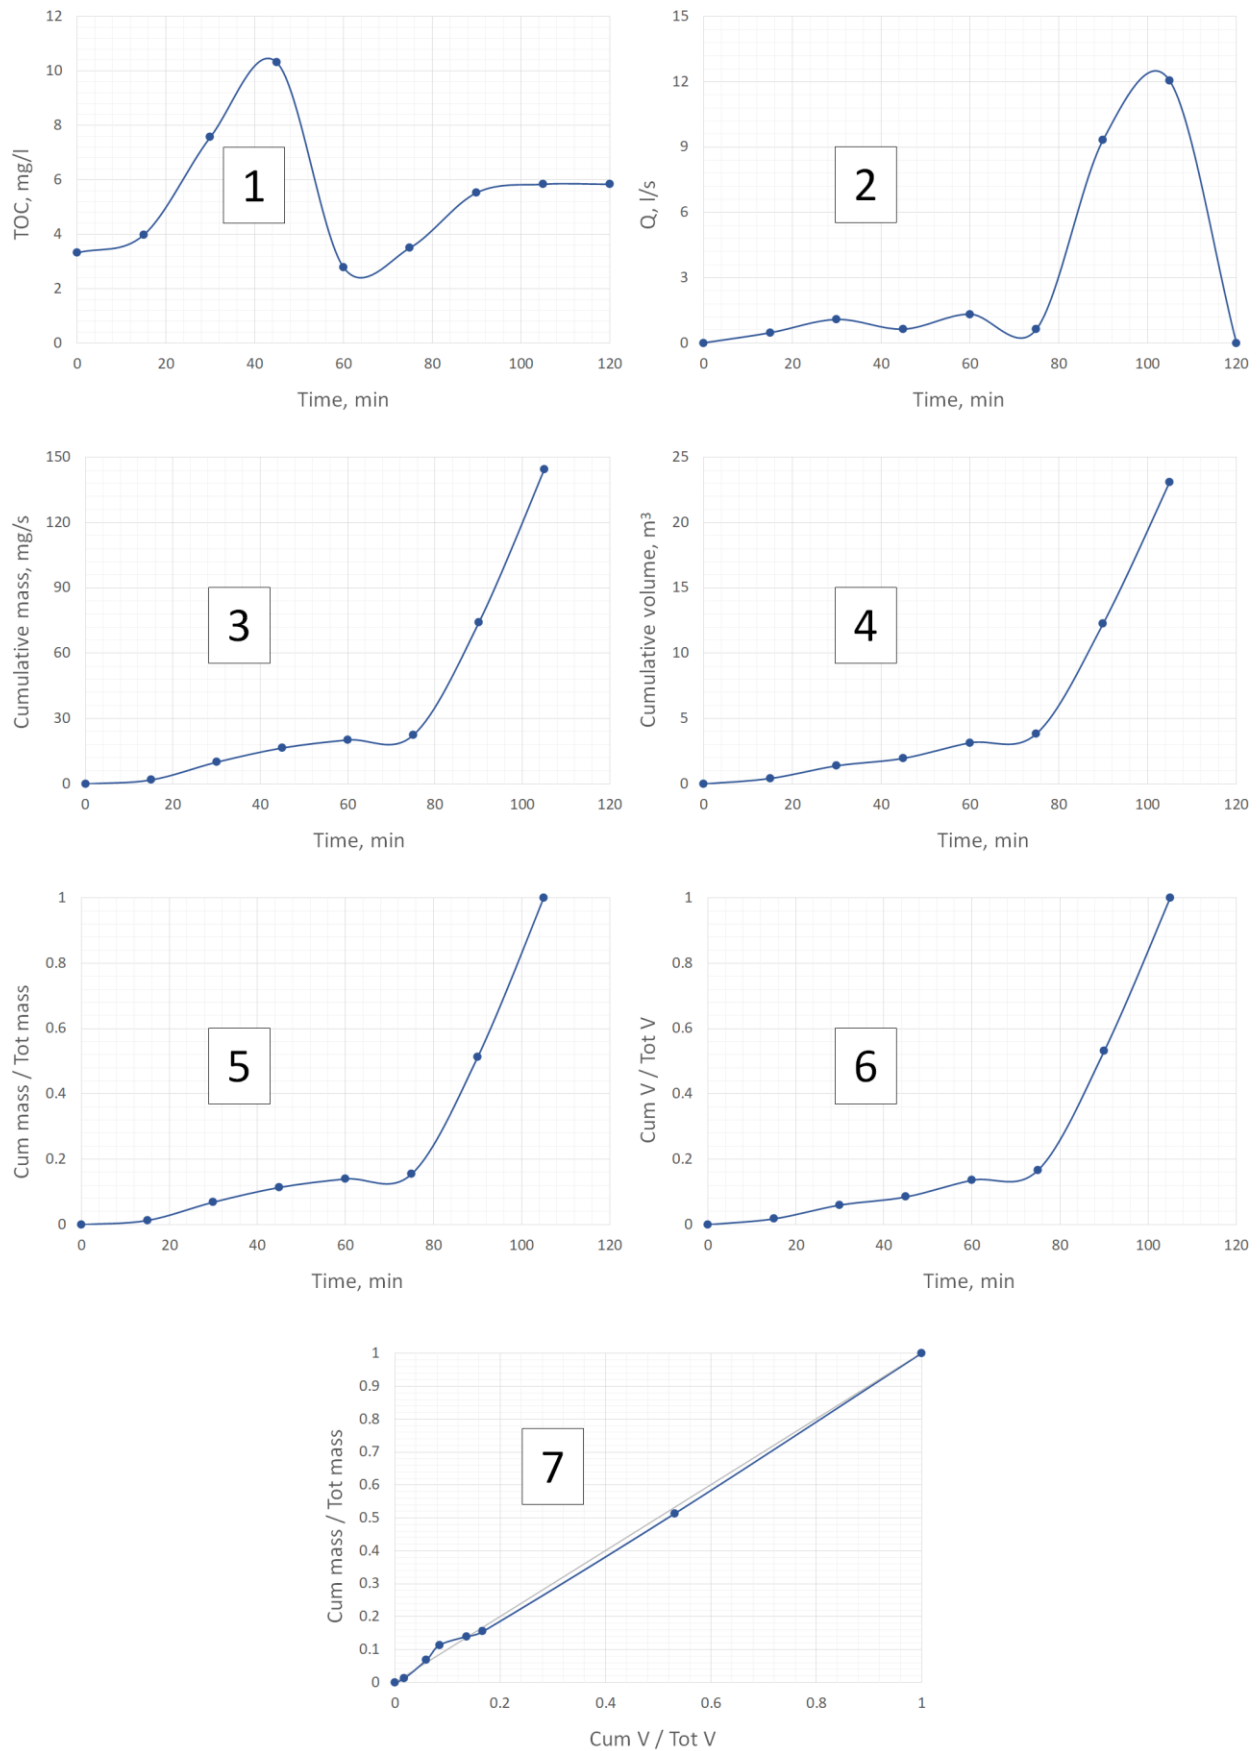

**Fig. 10** Example of the drawing of one M(V) curve for TOC for event 2
